# Supplementary material for: Pluronic F127 and D-α-Tocopheryl Polyethylene Glycol Succinate (TPGS) Mixed Micelles for Targeting Drug Delivery across The Blood Brain Barrier
Source: PubMed Central journal article supplement (PMC5462762; doi:10.1038/s41598-017-03123-y), 2017-06-07
Supplement: 41598_2017_3123_MOESM1_ESM.pdf [file 41598_2017_3123_MOESM1_ESM.pdf]

**Pluronic F127 and D- $\alpha$ -Tocopheryl Polyethylene Glycol Succinate (TPGS)  
Mixed Micelles for Targeting Drug Delivery  
across The Blood Brain Barrier**

Xin Meng<sup>1\*</sup>, Jiansheng Liu<sup>2\*</sup>, Xiangrong Yu<sup>3\*</sup>, Jiajia Li<sup>1</sup>, Xiaotong Lu<sup>1</sup>, Teng Shen<sup>1,4</sup>

<sup>1</sup>Department of Pharmaceutics, Key Laboratory of Smart Drug Delivery, Ministry of Education, School of Pharmacy, Fudan University, 826 Zhangheng Road, Shanghai 201203, China

<sup>2</sup>Department of Neurology, Shanghai Ninth People's Hospital, Shanghai Jiao Tong University School of Medicine, 639 Zhizaoju Road, Shanghai 200011, China

<sup>3</sup>Department of Radiology, Zhuhai People's Hospital, Zhuhai Hospital of Jinan University, 79 Kangning Road, Zhuhai 519000, China

<sup>4</sup>The Institutes of Integrative Medicine of Fudan University, 12 Wulumuqi Middle Road, Shanghai 200040, China

\*These authors contributed equally to this work.

Corresponding author: Teng Shen, Department of Pharmaceutics, Key Laboratory of Smart Drug Delivery, Ministry of Education, School of Pharmacy, Fudan University; The Institutes of Integrative Medicine of Fudan University.

Address: 826 Zhangheng Road, Shanghai 201203, China; 12 Wulumuqi Middle Road, Shanghai 200040, China.

Tel.: +86-021-51980081; fax: +86-021-51980081.

E-mail: [shenteng@fudan.edu.cn](mailto:shenteng@fudan.edu.cn).

Supplementary data.

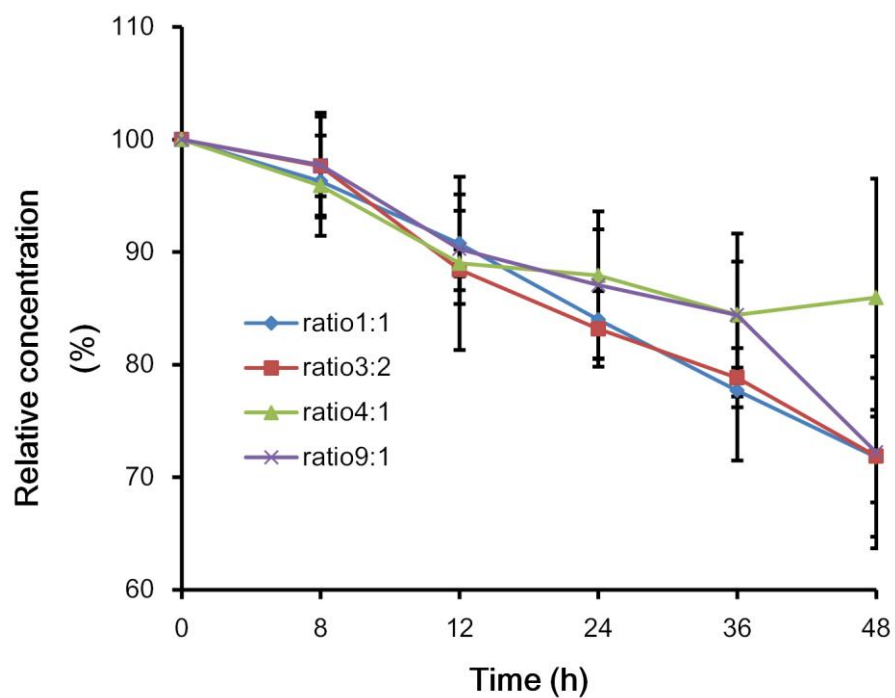

**Figure S1. The stability of DiR-loaded F127/TPGS mixed micelles with different ratios incubated at 37 °C. Each point represents mean  $\pm$ SD (n = 3).**
